# Supplementary material for: Parenteral Lidocaine for Complex Cancer Pain in the Home or Inpatient Hospice Setting: A Review and Synthesis of the Evidence
Source: PubMed Central journal article supplement — J Palliat Med. 2021 Jul 16;24(8):1154–60. doi: 10.1089/jpm.2020.0622 (PMC8309416; doi:10.1089/jpm.2020.0622), 2021-07-16
Supplement: Supp_TableS1.pdf [file Supp_TableS1.pdf]

|    |            |                                                                                                                                                                                                                                                                                                                                                                                                                                                                |           |
|----|------------|----------------------------------------------------------------------------------------------------------------------------------------------------------------------------------------------------------------------------------------------------------------------------------------------------------------------------------------------------------------------------------------------------------------------------------------------------------------|-----------|
| 1  | cancer     | "cancer s"[All Fields] OR "cancerated"[All Fields] OR "canceration"[All Fields] OR "cancerization"[All Fields] OR "cancerized"[All Fields] OR "cancerous"[All Fields] OR "neoplasms"[MeSH Terms] OR "neoplasms"[All Fields] OR "cancer"[All Fields] OR "cancers"[All Fields]                                                                                                                                                                                   | 4,143,296 |
| 2  | oncology   | "neoplasms"[MeSH Terms] OR "neoplasms"[All Fields] OR "oncology"[All Fields] OR "oncology s"[All Fields]                                                                                                                                                                                                                                                                                                                                                       | 3,589,893 |
| 3  | #1 OR #2   | "cancer s"[All Fields] OR "cancerated"[All Fields] OR "canceration"[All Fields] OR "cancerization"[All Fields] OR "cancerized"[All Fields] OR "cancerous"[All Fields] OR "neoplasms"[MeSH Terms] OR "neoplasms"[All Fields] OR "cancer"[All Fields] OR "cancers"[All Fields] OR "neoplasms"[MeSH Terms] OR "neoplasms"[All Fields] OR "oncology"[All Fields] OR "oncology s"[All Fields]                                                                       | 4,246,921 |
| 4  | pain       | "pain"[MeSH Terms] OR "pain"[All Fields]                                                                                                                                                                                                                                                                                                                                                                                                                       | 835,523   |
| 5  | #3 AND #4  | (((((("cancer s"[All Fields] OR "cancerated"[All Fields]) OR "canceration"[All Fields]) OR "cancerization"[All Fields]) OR "cancerized"[All Fields]) OR "cancerous"[All Fields]) OR "neoplasms"[MeSH Terms]) OR "neoplasms"[All Fields]) OR "cancer"[All Fields]) OR "cancers"[All Fields]) OR (((("neoplasms"[MeSH Terms] OR "neoplasms"[All Fields]) OR "oncology"[All Fields]) OR "oncology s"[All Fields])) AND ("pain"[MeSH Terms] OR "pain"[All Fields]) | 114,825   |
| 6  | lidocaine  | "lidocain"[All Fields] OR "lidocaine"[MeSH Terms] OR "lidocaine"[All Fields] OR "lignocaine"[All Fields] OR "lidocaine s"[All Fields] OR "lignocain"[All Fields]                                                                                                                                                                                                                                                                                               | 33,331    |
| 7  | lignocaine | "lidocain"[All Fields] OR "lidocaine"[MeSH Terms] OR "lidocaine"[All Fields] OR "lignocaine"[All Fields] OR "lidocaine s"[All Fields] OR "lignocain"[All Fields]                                                                                                                                                                                                                                                                                               | 33,331    |
| 8  | #6 OR #7   | "lidocain"[All Fields] OR "lidocaine"[MeSH Terms] OR "lidocaine"[All Fields] OR "lignocaine"[All Fields] OR "lidocaine s"[All Fields] OR "lignocain"[All Fields] OR "lidocain"[All Fields] OR "lidocaine"[MeSH Terms] OR "lidocaine"[All Fields] OR "lignocaine"[All Fields] OR "lidocaine s"[All Fields] OR "lignocain"[All Fields]                                                                                                                           | 33,331    |
| 9  | parenteral | ((("parenteral nutrition"[MeSH Terms] OR ("parenteral"[All Fields] AND "nutrition"[All Fields])) OR "parenteral nutrition"[All Fields]) OR "parenteral"[All Fields]) OR "parenterally"[All Fields] OR "parenterals"[All Fields]                                                                                                                                                                                                                                | 87,146    |
| 10 | injection  | "inject"[All Fields] OR "injectability"[All Fields] OR "injectant"[All Fields] OR "injectants"[All Fields] OR "injectate"[All Fields] OR "injectates"[All Fields] OR "injected"[All Fields] OR "injectible"[All Fields] OR "injectibles"[All Fields] OR "injecting"[All Fields] OR "injections"[MeSH Terms] OR "injections"[All Fields] OR "injectable"[All Fields] OR "injectables"[All Fields] OR "injection"[All Fields] OR "injects"[All Fields]           | 897,639   |

|    |                         |                                                                                                                                                                                                                                                                                                                                                                                                                                                                                                                                                                                                                                                                                                                                                                                                                                                                                                                                                                                                                                                                                                                                                                                                                                                                                                                                |           |
|----|-------------------------|--------------------------------------------------------------------------------------------------------------------------------------------------------------------------------------------------------------------------------------------------------------------------------------------------------------------------------------------------------------------------------------------------------------------------------------------------------------------------------------------------------------------------------------------------------------------------------------------------------------------------------------------------------------------------------------------------------------------------------------------------------------------------------------------------------------------------------------------------------------------------------------------------------------------------------------------------------------------------------------------------------------------------------------------------------------------------------------------------------------------------------------------------------------------------------------------------------------------------------------------------------------------------------------------------------------------------------|-----------|
| 11 | intravenous             | "intravenous"[All Fields] OR "intravenously"[All Fields] OR "intravenous"[All Fields] OR "intravenously"[All Fields]                                                                                                                                                                                                                                                                                                                                                                                                                                                                                                                                                                                                                                                                                                                                                                                                                                                                                                                                                                                                                                                                                                                                                                                                           | 438,772   |
| 12 | subcutaneous            | "subcutaneous"[All Fields] OR "subcutaneously"[All Fields] OR "subcutaneous"[All Fields]                                                                                                                                                                                                                                                                                                                                                                                                                                                                                                                                                                                                                                                                                                                                                                                                                                                                                                                                                                                                                                                                                                                                                                                                                                       | 185,826   |
| 13 | #9 OR #10 OR #11 OR #12 | (((((("parenteral nutrition"[MeSH Terms] OR ("parenteral"[All Fields] AND "nutrition"[All Fields])) OR "parenteral nutrition"[All Fields]) OR "parenteral"[All Fields]) OR "parenterally"[All Fields]) OR "parenterals"[All Fields]) OR (((((((((((("inject"[All Fields] OR "injectability"[All Fields]) OR "injectant"[All Fields]) OR "injectants"[All Fields]) OR "injectate"[All Fields]) OR "injectates"[All Fields]) OR "injected"[All Fields]) OR "injectible"[All Fields]) OR "injectibles"[All Fields]) OR "injecting"[All Fields]) OR "injections"[MeSH Terms]) OR "injections"[All Fields]) OR "injectable"[All Fields]) OR "injectables"[All Fields]) OR "injection"[All Fields]) OR "injects"[All Fields])) OR (((("intravenous"[All Fields] OR "intravenously"[All Fields]) OR "intravenous"[All Fields]) OR "intravenously"[All Fields])) OR ((("subcutaneous"[All Fields] OR "subcutaneously"[All Fields]) OR "subcutaneous"[All Fields]))                                                                                                                                                                                                                                                                                                                                                                     | 1,340,049 |
| 14 | #8 AND #13              | (((((("lidocain"[All Fields] OR "lidocaine"[MeSH Terms]) OR "lidocaine"[All Fields]) OR "lignocaine"[All Fields]) OR "lidocaine s"[All Fields]) OR "lignocain"[All Fields]) OR (((("lidocain"[All Fields] OR "lidocaine"[MeSH Terms]) OR "lidocaine"[All Fields]) OR "lignocaine"[All Fields]) OR "lidocaine s"[All Fields]) OR "lignocain"[All Fields])) AND (((((((((((("parenteral nutrition"[MeSH Terms] OR ("parenteral"[All Fields] AND "nutrition"[All Fields])) OR "parenteral nutrition"[All Fields]) OR "parenteral"[All Fields]) OR "parenterally"[All Fields]) OR "parenterals"[All Fields]) OR (((((((((((("inject"[All Fields] OR "injectability"[All Fields]) OR "injectant"[All Fields]) OR "injectants"[All Fields]) OR "injectate"[All Fields]) OR "injectates"[All Fields]) OR "injected"[All Fields]) OR "injectible"[All Fields]) OR "injectibles"[All Fields]) OR "injecting"[All Fields]) OR "injections"[MeSH Terms]) OR "injections"[All Fields]) OR "injectable"[All Fields]) OR "injectables"[All Fields]) OR "injection"[All Fields]) OR "injects"[All Fields])) OR (((("intravenous"[All Fields] OR "intravenously"[All Fields]) OR "intravenous"[All Fields]) OR "intravenously"[All Fields])) OR ((("subcutaneous"[All Fields] OR "subcutaneously"[All Fields]) OR "subcutaneous"[All Fields])) | 13,030    |

|    |                           |                                                                                                                                                                                                                                                                                                                                                                                                                                                                                                                                                                                                                                                                                                                                                                                                                                                                                                                                                                                                                                                                                                                                                                                                                                                                                                                                                                                                                                                                                                                                                                                                                                                                                                                                                                                                               |           |
|----|---------------------------|---------------------------------------------------------------------------------------------------------------------------------------------------------------------------------------------------------------------------------------------------------------------------------------------------------------------------------------------------------------------------------------------------------------------------------------------------------------------------------------------------------------------------------------------------------------------------------------------------------------------------------------------------------------------------------------------------------------------------------------------------------------------------------------------------------------------------------------------------------------------------------------------------------------------------------------------------------------------------------------------------------------------------------------------------------------------------------------------------------------------------------------------------------------------------------------------------------------------------------------------------------------------------------------------------------------------------------------------------------------------------------------------------------------------------------------------------------------------------------------------------------------------------------------------------------------------------------------------------------------------------------------------------------------------------------------------------------------------------------------------------------------------------------------------------------------|-----------|
| 15 | #5 AND #14                | <p>((((((((("cancer s"[All Fields] OR "cancerated"[All Fields]) OR "canceration"[All Fields]) OR "cancerization"[All Fields]) OR "cancerized"[All Fields]) OR "cancerous"[All Fields]) OR "neoplasms"[MeSH Terms]) OR "neoplasms"[All Fields]) OR "cancer"[All Fields]) OR "cancers"[All Fields]) OR (((("neoplasms"[MeSH Terms] OR "neoplasms"[All Fields]) OR "oncology"[All Fields]) OR "oncology s"[All Fields])) AND ("pain"[MeSH Terms] OR "pain"[All Fields])) AND (((((((("lidocain"[All Fields] OR "lidocaine"[MeSH Terms]) OR "lidocaine"[All Fields]) OR "lignocaine"[All Fields]) OR "lidocaine s"[All Fields]) OR "lignocain"[All Fields]) OR (((("lidocain"[All Fields] OR "lidocaine"[MeSH Terms]) OR "lidocaine"[All Fields]) OR "lignocaine"[All Fields]) OR "lidocaine s"[All Fields]) OR "lignocain"[All Fields])) AND (((((((("parenteral nutrition"[MeSH Terms] OR ("parenteral"[All Fields] AND "nutrition"[All Fields])) OR "parenteral nutrition"[All Fields]) OR "parenteral"[All Fields]) OR "parenterally"[All Fields]) OR "parenterals"[All Fields]) OR (((((((((((("inject"[All Fields] OR "injectability"[All Fields]) OR "injectant"[All Fields]) OR "injectants"[All Fields]) OR "injectate"[All Fields]) OR "injectates"[All Fields]) OR "injected"[All Fields]) OR "injectible"[All Fields]) OR "injectibles"[All Fields]) OR "injecting"[All Fields]) OR "injections"[MeSH Terms]) OR "injections"[All Fields]) OR "injectable"[All Fields]) OR "injectables"[All Fields]) OR "injection"[All Fields]) OR "injects"[All Fields])) OR (((("intravenous"[All Fields] OR "intravenously"[All Fields]) OR "intravenous"[All Fields]) OR "intravenously"[All Fields])) OR (((("subcutaneous"[All Fields] OR "subcutaneously"[All Fields]) OR "subcutaneous"[All Fields]))))</p> | 371       |
| 16 | surgical OR postoperative | <p>(((("surgical procedures, operative"[MeSH Terms] OR ("surgical"[All Fields] AND "procedures"[All Fields]) AND "operative"[All Fields])) OR "operative surgical procedures"[All Fields]) OR "surgical"[All Fields]) OR "surgically"[All Fields]) OR "surgicals"[All Fields]) OR (((((((("postoperative period"[MeSH Terms] OR ("postoperative"[All Fields] AND "period"[All Fields])) OR "postoperative period"[All Fields]) OR "postop"[All Fields]) OR "postoperative"[All Fields]) OR "postoperatively"[All Fields]) OR "postoperatives"[All Fields])</p>                                                                                                                                                                                                                                                                                                                                                                                                                                                                                                                                                                                                                                                                                                                                                                                                                                                                                                                                                                                                                                                                                                                                                                                                                                                | 3,946,796 |

|    |             |                                                                                                                                                                                                                                                                                                                                                                                                                                                                                                                                                                                                                                                                                                                                                                                                                                                                                                                                                                                                                                                                                                                                                                                                                                                                                                                                                                                                                                                                                                                                                                                                                                                                                                                                                                                                                                                                                                                                                                                                                                                                                                                                                                                                                                                                                                                                                                  |     |
|----|-------------|------------------------------------------------------------------------------------------------------------------------------------------------------------------------------------------------------------------------------------------------------------------------------------------------------------------------------------------------------------------------------------------------------------------------------------------------------------------------------------------------------------------------------------------------------------------------------------------------------------------------------------------------------------------------------------------------------------------------------------------------------------------------------------------------------------------------------------------------------------------------------------------------------------------------------------------------------------------------------------------------------------------------------------------------------------------------------------------------------------------------------------------------------------------------------------------------------------------------------------------------------------------------------------------------------------------------------------------------------------------------------------------------------------------------------------------------------------------------------------------------------------------------------------------------------------------------------------------------------------------------------------------------------------------------------------------------------------------------------------------------------------------------------------------------------------------------------------------------------------------------------------------------------------------------------------------------------------------------------------------------------------------------------------------------------------------------------------------------------------------------------------------------------------------------------------------------------------------------------------------------------------------------------------------------------------------------------------------------------------------|-----|
| 17 | #15 NOT #16 | <pre> ((((((((("cancer s"[All Fields] OR "cancerated"[All Fields]) OR "caneration"[All Fields]) OR "cancerization"[All Fields]) OR "canerized"[All Fields]) OR "canerous"[All Fields]) OR "neoplasms"[MeSH Terms]) OR "neoplasms"[All Fields]) OR "caner"[All Fields]) OR "cancers"[All Fields]) OR (("neoplasms"[MeSH Terms] OR "neoplasms"[All Fields]) OR "oncology"[All Fields]) OR "oncology s"[All Fields])) AND ("pain"[MeSH Terms] OR "pain"[All Fields])) AND ((((("lidocain"[All Fields] OR "lidocaine"[MeSH Terms]) OR "lidocaine"[All Fields]) OR "lignocaine"[All Fields]) OR "lidocaine s"[All Fields]) OR "lignocain"[All Fields]) OR (((("lidocain"[All Fields] OR "lidocaine"[MeSH Terms]) OR "lidocaine"[All Fields]) OR "lignocaine"[All Fields]) OR "lidocaine s"[All Fields]) OR "lignocain"[All Fields])) AND (((((((("parenteral nutrition"[MeSH Terms] OR ("parenteral"[All Fields] AND "nutrition"[All Fields])) OR "parenteral nutrition"[All Fields]) OR "parenteral"[All Fields]) OR "parenterally"[All Fields]) OR "parenterals"[All Fields]) OR (((((((((((("inject"[All Fields] OR "injectability"[All Fields]) OR "injectant"[All Fields]) OR "injectants"[All Fields]) OR "injectate"[All Fields]) OR "injectates"[All Fields]) OR "injecte"[All Fields]) OR "injectible"[All Fields]) OR "injectibles"[All Fields]) OR "injecting"[All Fields]) OR "injections"[MeSH Terms]) OR "injections"[All Fields]) OR "injectable"[All Fields]) OR "injectables"[All Fields]) OR "injectio"[All Fields]) OR "injects"[All Fields])) OR (("intravenous"[All Fields] OR "intravenously"[All Fields]) OR "intravenous"[All Fields]) OR "intravenously"[All Fields])) OR (("subcutaneous"[All Fields] OR "subcutaneously"[All Fields]) OR "subcutaneous"[All Fields])) NOT (((((((("surgical procedures, operative"[MeSH Terms] OR ("surgical"[All Fields] AND "procedures"[All Fields]) AND "operative"[All Fields])) OR "operative surgical procedures"[All Fields]) OR "surgical"[All Fields]) OR "surgically"[All Fields]) OR "surgicals"[All Fields]) OR ((((("postoperative period"[MeSH Terms] OR ("postoperative"[All Fields] AND "period"[All Fields])) OR "postoperative period"[All Fields]) OR "postop"[All Fields]) OR "postoperative"[All Fields]) OR "postoperatively"[All Fields]) OR "postoperatives"[All Fields])) </pre> | 128 |
|----|-------------|------------------------------------------------------------------------------------------------------------------------------------------------------------------------------------------------------------------------------------------------------------------------------------------------------------------------------------------------------------------------------------------------------------------------------------------------------------------------------------------------------------------------------------------------------------------------------------------------------------------------------------------------------------------------------------------------------------------------------------------------------------------------------------------------------------------------------------------------------------------------------------------------------------------------------------------------------------------------------------------------------------------------------------------------------------------------------------------------------------------------------------------------------------------------------------------------------------------------------------------------------------------------------------------------------------------------------------------------------------------------------------------------------------------------------------------------------------------------------------------------------------------------------------------------------------------------------------------------------------------------------------------------------------------------------------------------------------------------------------------------------------------------------------------------------------------------------------------------------------------------------------------------------------------------------------------------------------------------------------------------------------------------------------------------------------------------------------------------------------------------------------------------------------------------------------------------------------------------------------------------------------------------------------------------------------------------------------------------------------------|-----|

|    |            |                                                                                                                                                                                                                                                                                                                                                                                                                                                                                                                                                                                                                                                                                                                                                                                                                                                                                                                                                                                                                                                                                                                                                                                                                                                                                                                                                                                                                                                                                                                                                                                                                                                                                                                                                                                                        |     |
|----|------------|--------------------------------------------------------------------------------------------------------------------------------------------------------------------------------------------------------------------------------------------------------------------------------------------------------------------------------------------------------------------------------------------------------------------------------------------------------------------------------------------------------------------------------------------------------------------------------------------------------------------------------------------------------------------------------------------------------------------------------------------------------------------------------------------------------------------------------------------------------------------------------------------------------------------------------------------------------------------------------------------------------------------------------------------------------------------------------------------------------------------------------------------------------------------------------------------------------------------------------------------------------------------------------------------------------------------------------------------------------------------------------------------------------------------------------------------------------------------------------------------------------------------------------------------------------------------------------------------------------------------------------------------------------------------------------------------------------------------------------------------------------------------------------------------------------|-----|
| 18 | #5 AND #14 | ((((((((("cancer s"[All Fields] OR "cancerated"[All Fields]) OR "canceration"[All Fields]) OR "cancerization"[All Fields]) OR "cancerized"[All Fields]) OR "cancerous"[All Fields]) OR "neoplasms"[MeSH Terms]) OR "neoplasms"[All Fields]) OR "cancer"[All Fields]) OR "cancers"[All Fields]) OR (((("neoplasms"[MeSH Terms] OR "neoplasms"[All Fields]) OR "oncology"[All Fields]) OR "oncology s"[All Fields])) AND ("pain"[MeSH Terms] OR "pain"[All Fields])) AND (((((((("lidocain"[All Fields] OR "lidocaine"[MeSH Terms]) OR "lidocaine"[All Fields]) OR "lignocaine"[All Fields]) OR "lidocaine s"[All Fields]) OR "lignocain"[All Fields]) OR (((("lidocain"[All Fields] OR "lidocaine"[MeSH Terms]) OR "lidocaine"[All Fields]) OR "lignocaine"[All Fields]) OR "lidocaine s"[All Fields]) OR "lignocain"[All Fields])) AND (((((((("parenteral nutrition"[MeSH Terms] OR ("parenteral"[All Fields] AND "nutrition"[All Fields])) OR "parenteral nutrition"[All Fields]) OR "parenteral"[All Fields]) OR "parenterally"[All Fields]) OR "parenterals"[All Fields]) OR (((((((((((("inject"[All Fields] OR "injectability"[All Fields]) OR "injectant"[All Fields]) OR "injectants"[All Fields]) OR "injectate"[All Fields]) OR "injectates"[All Fields]) OR "injected"[All Fields]) OR "injectible"[All Fields]) OR "injectibles"[All Fields]) OR "injecting"[All Fields]) OR "injections"[MeSH Terms]) OR "injections"[All Fields]) OR "injectable"[All Fields]) OR "injectables"[All Fields]) OR "injection"[All Fields]) OR "injects"[All Fields])) OR (((("intravenous"[All Fields] OR "intravenously"[All Fields]) OR "intravenous"[All Fields]) OR "intravenously"[All Fields])) OR (((("subcutaneous"[All Fields] OR "subcutaneously"[All Fields]) OR "subcutaneous"[All Fields])))) | 353 |
|----|------------|--------------------------------------------------------------------------------------------------------------------------------------------------------------------------------------------------------------------------------------------------------------------------------------------------------------------------------------------------------------------------------------------------------------------------------------------------------------------------------------------------------------------------------------------------------------------------------------------------------------------------------------------------------------------------------------------------------------------------------------------------------------------------------------------------------------------------------------------------------------------------------------------------------------------------------------------------------------------------------------------------------------------------------------------------------------------------------------------------------------------------------------------------------------------------------------------------------------------------------------------------------------------------------------------------------------------------------------------------------------------------------------------------------------------------------------------------------------------------------------------------------------------------------------------------------------------------------------------------------------------------------------------------------------------------------------------------------------------------------------------------------------------------------------------------------|-----|

|    |             |                                                                                                                                                                                                                                                                                                                                                                                                                                                                                                                                                                                                                                                                                                                                                                                                                                                                                                                                                                                                                                                                                                                                                                                                                                                                                                                                                                                                                                                                                                                                                                                                                                                                                                                                                                                                                                                                                                                                                                                                                                                                                                                                                                                                                                                                                                                                                                     |     |
|----|-------------|---------------------------------------------------------------------------------------------------------------------------------------------------------------------------------------------------------------------------------------------------------------------------------------------------------------------------------------------------------------------------------------------------------------------------------------------------------------------------------------------------------------------------------------------------------------------------------------------------------------------------------------------------------------------------------------------------------------------------------------------------------------------------------------------------------------------------------------------------------------------------------------------------------------------------------------------------------------------------------------------------------------------------------------------------------------------------------------------------------------------------------------------------------------------------------------------------------------------------------------------------------------------------------------------------------------------------------------------------------------------------------------------------------------------------------------------------------------------------------------------------------------------------------------------------------------------------------------------------------------------------------------------------------------------------------------------------------------------------------------------------------------------------------------------------------------------------------------------------------------------------------------------------------------------------------------------------------------------------------------------------------------------------------------------------------------------------------------------------------------------------------------------------------------------------------------------------------------------------------------------------------------------------------------------------------------------------------------------------------------------|-----|
| 19 | #15 NOT #16 | <pre> ((((((((("cancer s"[All Fields] OR "cancerated"[All Fields]) OR "caneration"[All Fields]) OR "cancerization"[All Fields]) OR "canerized"[All Fields]) OR "canerous"[All Fields]) OR "neoplasms"[MeSH Terms]) OR "neoplasms"[All Fields]) OR "caner"[All Fields]) OR "cancers"[All Fields]) OR (("neoplasms"[MeSH Terms] OR "neoplasms"[All Fields]) OR "oncology"[All Fields]) OR "oncology s"[All Fields])) AND ("pain"[MeSH Terms] OR "pain"[All Fields])) AND ((((("lidocain"[All Fields] OR "lidocaine"[MeSH Terms]) OR "lidocaine"[All Fields]) OR "lignocaine"[All Fields]) OR "lidocaine s"[All Fields]) OR "lignocain"[All Fields]) OR (((("lidocain"[All Fields] OR "lidocaine"[MeSH Terms]) OR "lidocaine"[All Fields]) OR "lignocaine"[All Fields]) OR "lidocaine s"[All Fields]) OR "lignocain"[All Fields])) AND (((((((("parenteral nutrition"[MeSH Terms] OR ("parenteral"[All Fields] AND "nutrition"[All Fields])) OR "parenteral nutrition"[All Fields]) OR "parenteral"[All Fields]) OR "parenterally"[All Fields]) OR "parenterals"[All Fields]) OR (((((((((((("inject"[All Fields] OR "injectability"[All Fields]) OR "injectant"[All Fields]) OR "injectants"[All Fields]) OR "injectate"[All Fields]) OR "injectates"[All Fields]) OR "injecte"[All Fields]) OR "injectible"[All Fields]) OR "injectibles"[All Fields]) OR "injecting"[All Fields]) OR "injections"[MeSH Terms]) OR "injections"[All Fields]) OR "injectable"[All Fields]) OR "injectables"[All Fields]) OR "injection"[All Fields]) OR "injects"[All Fields])) OR (("intraveneous"[All Fields] OR "intraveneously"[All Fields]) OR "intravenous"[All Fields]) OR "intravenously"[All Fields])) OR (("subcutaneous"[All Fields] OR "subcutaneously"[All Fields]) OR "subcutaneous"[All Fields])) NOT (((((((("surgical procedures, operative"[MeSH Terms] OR ("surgical"[All Fields] AND "procedures"[All Fields]) AND "operative"[All Fields])) OR "operative surgical procedures"[All Fields]) OR "surgical"[All Fields]) OR "surgically"[All Fields]) OR "surgicals"[All Fields]) OR ((((("postoperative period"[MeSH Terms] OR ("postoperative"[All Fields] AND "period"[All Fields])) OR "postoperative period"[All Fields]) OR "postop"[All Fields]) OR "postoperative"[All Fields]) OR "postoperatively"[All Fields]) OR "postoperatives"[All Fields])) </pre> | 116 |
|----|-------------|---------------------------------------------------------------------------------------------------------------------------------------------------------------------------------------------------------------------------------------------------------------------------------------------------------------------------------------------------------------------------------------------------------------------------------------------------------------------------------------------------------------------------------------------------------------------------------------------------------------------------------------------------------------------------------------------------------------------------------------------------------------------------------------------------------------------------------------------------------------------------------------------------------------------------------------------------------------------------------------------------------------------------------------------------------------------------------------------------------------------------------------------------------------------------------------------------------------------------------------------------------------------------------------------------------------------------------------------------------------------------------------------------------------------------------------------------------------------------------------------------------------------------------------------------------------------------------------------------------------------------------------------------------------------------------------------------------------------------------------------------------------------------------------------------------------------------------------------------------------------------------------------------------------------------------------------------------------------------------------------------------------------------------------------------------------------------------------------------------------------------------------------------------------------------------------------------------------------------------------------------------------------------------------------------------------------------------------------------------------------|-----|
